# Supplementary material for: 5-year follow-up of spinal and sacroiliac MRI abnormalities in early axial spondyloarthritis: data from the DESIR cohort
Source: PubMed Central journal article supplement — RMD Open. 2020 Feb 5;6(1):e001093. doi: 10.1136/rmdopen-2019-001093 (PMC7046942; doi:10.1136/rmdopen-2019-001093), 2020-02-05
Supplement: rmdopen-2019-001093supp001.pdf [file rmdopen-2019-001093supp001.pdf]

**S1 – Structural lesions in the sacroiliac joints of 151 patients included in the DESIR cohort at baseline. 2-year and 5-year follow up.**

|                                                         | Baseline<br>mean (SD) | 2 years<br>mean (SD)<br>(n=136) | 5 years<br>mean (SD) | Change over 5 years<br>mean (SD) | p-value®         |
|---------------------------------------------------------|-----------------------|---------------------------------|----------------------|----------------------------------|------------------|
| <b>Number of erosions (0-40)</b>                        |                       |                                 |                      |                                  |                  |
| Reader 1                                                | 1.4 (2.8)             | 1.4 (2.9)                       | 1.6 (3.1)            | 0.1 (1.9)                        | 0.352            |
| Reader 2                                                | 1.0 (2.3)             | 1.0 (2.5)                       | 1.2 (2.6)            | 0.2 (2.1)                        | 0.239            |
| Reader 3                                                | 0.7 (1.5)             | 0.9 (1.7)                       | 0.9 (1.9)            | 0.2 (1.7)                        | 0.074            |
| <b>Mean score**</b>                                     | <b>1.0 (1.9)</b>      | <b>1.1 (2.0)</b>                | <b>1.2 (2.1)</b>     | <b>0.2 (1.4)</b>                 | 0.085            |
| ICC (95% CI)                                            | 0.6<br>(0.5 – 0.6)    | 0.5<br>(0.4 – 0.6)              | 0.5<br>(0.4 – 0.6)   | 0.3<br>(0.2 – 0.4)               |                  |
| <b>Number of fatty lesions (0-40)</b>                   |                       |                                 |                      |                                  |                  |
| Reader 1                                                | 1.1 (3.0)             | 1.6 (4.0)                       | 1.9 (4.7)            | 0.9 (2.4)                        | <0.001           |
| Reader 2                                                | 0.8 (2.2)             | 1.4 (3.7)                       | 1.6 (3.6)            | 0.8 (2.3)                        | <0.001           |
| Reader 3                                                | 1.4 (3.3)             | 2.0 (4.5)                       | 2.2 (4.6)            | 0.8 (3.1)                        | <0.001           |
| <b>Mean score**</b>                                     | <b>1.1 (2.6)</b>      | <b>1.7 (4.0)</b>                | <b>1.9 (4.1)</b>     | <b>0.8 (2.2)</b>                 | <0.001           |
| ICC (95% CI)                                            | 0.8<br>(0.7 – 0.8)    | 0.9<br>(0.9 – 0.9)              | 0.8<br>(0.7 – 0.8)   | 0.6<br>(0.5 – 0.6)               |                  |
| <b>Number of fatty lesions and / or erosions (0-80)</b> |                       |                                 |                      |                                  |                  |
| Reader 1                                                | 2.5 (4.9)             | 3.0 (5.8)                       | 3.5 (6.5)            | 1.0 (3.2)                        |                  |
| Reader 2                                                | 1.7 (3.7)             | 2.5 (4.9)                       | 2.8 (5.0)            | 1.0 (2.9)                        | <0.001           |
| Reader 3                                                | 2.1 (4.0)             | 2.8 (5.2)                       | 3.2 (5.3)            | 1.0 (3.6)                        | <0.001           |
| <b>Mean score** (</b>                                   | <b>2.1 (3.9)</b>      | <b>2.8 (5.0)</b>                | <b>3.1 (5.1)</b>     | <b>1.0 (2.6)</b>                 | <b>&lt;0.001</b> |
| ICC (95% CI)                                            | 0.8<br>(0.7 – 0.8)    | 0.8<br>(0.8 – 0.9)              | 0.7<br>(0.7 – 0.8)   | 0.5<br>(0.4 – 0.6)               |                  |
| <b>Total number of lesions (0-144)™</b>                 |                       |                                 |                      |                                  |                  |
| Reader 1                                                | 2.8 (5.4)             | 3.4 (6.7)                       | 4.1 (7.8)            | 1.4 (3.6)                        | <0.001           |
| Reader 2                                                | 2.3 (4.6)             | 3.2 (6.4)                       | 3.7 (6.8)            | 1.4 (3.5)                        | <0.001           |
| Reader 3                                                | 2.7 (4.7)             | 3.4 (6.4)                       | 3.8 (6.3)            | 1.1 (3.8)                        | <0.001           |
| <b>Mean score**</b>                                     | <b>2.6 (4.5)</b>      | <b>3.3 (6.2)</b>                | <b>3.9 (6.5)</b>     | <b>1.3 (3.1)</b>                 | <b>&lt;0.001</b> |
| ICC (95% CI)                                            | 0.8<br>(0.7 – 0.8)    | 0.9<br>(0.8 – 0.9)              | 0.8<br>(0.8 – 0.9)   | 0.6<br>(0.5 – 0.7)               |                  |

\*MRI-SIJ T1-w sequences were complete for 151 cases, in one case MRI-SIJ STIR sequence was missing at five years. ®Paired samples T-test. \*\*Mean of 3 readers. ™Fatty lesions, erosions, sclerosis, partial ankylosis/total ankylosis. ICC, Intra-class correlation coefficient ; CI, Confidence Interval; NC, not calculated.
