# Supplementary material for: 5-year follow-up of spinal and sacroiliac MRI abnormalities in early axial spondyloarthritis: data from the DESIR cohort
Source: PubMed Central journal article supplement — RMD Open. 2020 Feb 5;6(1):e001093. doi: 10.1136/rmdopen-2019-001093 (PMC7046942; doi:10.1136/rmdopen-2019-001093), 2020-02-05
Supplement: rmdopen-2019-001093supp002.pdf [file rmdopen-2019-001093supp002.pdf]

**S2 – Structural lesions in the spine of patients included in the DESIR cohort at baseline, 2-year and 5-year follow up.**

|                                                          | Baseline mean (SD)  | 2 years mean (SD) (n=129) | 5 years mean (SD)   | Change over 5 years mean (SD) | p-value®         |
|----------------------------------------------------------|---------------------|---------------------------|---------------------|-------------------------------|------------------|
| <b>Number of erosions (0-92)</b>                         |                     |                           |                     |                               |                  |
| Reader 1 (n=145*)                                        | 0.1 (0.4)           | 0.0 (0.3)                 | 0.2 (0.3)           | 0.0 (0.5)                     | 1.000            |
| Reader 2 (n=143*)                                        | 0.1 (0.4)           | 0.1 (0.5)                 | 0.2 (0.5)           | 0.1 (0.4)                     | <b>0.010</b>     |
| Reader 3 (n=143*)                                        | 0.0 (0.3)           | 0.1 (0.3)                 | 0.0 (0.2)           | 0.0 (0.0)                     | 1.000            |
| <b>Mean score*** (n=141*)</b>                            | <b>0.1 (0.2)</b>    | <b>0.1 (0.2)</b>          | <b>0.1 (0.2)</b>    | <b>0.0 (0.2)</b>              | 1.000            |
| ICC (95% CI)                                             | 0.0<br>(-0.1 – 0.1) | 0.1<br>(0.0 – 0.2)        | 0.0<br>(-0.1 – 0.1) | 0.0 (-0.1 – 0.1)              |                  |
| <b>Number of bone spurs (0-92)</b>                       |                     |                           |                     |                               |                  |
| Reader 1 (n=145*)                                        | 0.0 (0.0)           | 0(0)                      | 0.1 (0.4)           | 0.1 (0.4)                     | 0.059            |
| Reader 2 (n=143*)                                        | 0.1 (0.4)           | 0.1 (0.4)                 | 0.1 (0.4)           | 0.0 (0.1)                     | 0.083            |
| Reader 3 (n=143*)                                        | 0.3 (0.9)           | 0.4 (0.9)                 | 0.4 (0.9)           | 0.1 (0.6)                     | 0.115            |
| <b>Mean score*** (n=141*)</b>                            | <b>0.1 (0.3)</b>    | <b>0.2 (0.3)</b>          | <b>0.2 (0.4)</b>    | <b>0.1 (0.3)</b>              | <b>0.012</b>     |
| ICC (95% CI)                                             | 0.0<br>(-0.1 – 0.1) | 0.0<br>(0.0 – 0.2)        | 0.0<br>(-0.1 – 0.1) | 0.0 (-0.1 – 0.1)              |                  |
| <b>Number of fatty lesions (0-92)</b>                    |                     |                           |                     |                               |                  |
| Reader 1 (n=145*)                                        | 0.2 (0.9)           | 0.2 (0.8)                 | 0.2 (1.0)           | 0.0 (0.5)                     | 0.733            |
| Reader 2 (n=143*)                                        | 0.3 (0.8)           | 0.4 (1.0)                 | 0.5 (1.2)           | 0.2 (0.8)                     | <b>0.004</b>     |
| Reader 3 (n=143*)                                        | 0.2 (0.8)           | 0.3 (1.0)                 | 0.4 (1.2)           | 0.2 (0.7)                     | <b>0.004</b>     |
| <b>Mean score*** (n=141*)</b>                            | <b>0.2 (0.7)</b>    | <b>0.3 (0.8)</b>          | <b>0.4 (1.0)</b>    | <b>0.1 (0.4)</b>              | <b>0.001</b>     |
| ICC (95% CI)                                             | 0.6<br>(0.6 – 0.7)  | 0.5<br>(0.4 – 0.6)        | 0.7<br>(0.6 – 0.7)  | 0.3 (0.2 – 0.4)               |                  |
| <b>Number of fatty lesions and / or erosions (0-184)</b> |                     |                           |                     |                               |                  |
| Reader 1 (n=145*)                                        | 0.2 (1.0)           | 0.2 (1.0)                 | 0.2 (1.1)           | 0.0 (1.1)                     | 0.817            |
| Reader 2 (n=143*)                                        | 0.4 (1.1)           | 0.5 (1.3)                 | 0.7 (1.5)           | 0.3 (0.9)                     | <b>&lt;0.001</b> |
| Reader 3 (n=143*)                                        | 0.2 (0.9)           | 0.4 (1.1)                 | 0.4 (1.3)           | 0.2 (0.8)                     | <b>0.005</b>     |
| <b>Mean score*** (n=141*)</b>                            | <b>0.3 (0.8)</b>    | <b>0.3 (1.0)</b>          | <b>0.4 (1.1)</b>    | <b>0.2 (0.5)</b>              | <b>&lt;0.001</b> |
| ICC (95% CI)                                             | 0.6<br>(0.5 - 0.7)  | 0.5<br>(0.5 – 0.6)        | 0.6<br>(0.5 – 0.7)  | 0.2 (0.1 – 0.3)               |                  |
| <b>Total number of lesions (0-322)™</b>                  |                     |                           |                     |                               |                  |
| Reader 1 (n=145*)                                        | 0.3 (1.1)           | 0.2 (1.1)                 | 0.4 (1.3)           | 0.1 (0.9)                     | 0.223            |
| Reader 2 (n=143*)                                        | 0.5 (1.2)           | 0.6 (1.4)                 | 0.7 (1.6)           | 0.3 (0.9)                     | <b>&lt;0.001</b> |
| Reader 3 (n=143*)                                        | 0.6 (1.2)           | 0.8 (1.6)                 | 0.9 (1.6)           | 0.3 (1.1)                     | <b>0.002</b>     |
| <b>Mean score*** (n=141*)</b>                            | <b>0.4 (0.9)</b>    | <b>0.5 (1.1)</b>          | <b>0.6 (1.2)</b>    | <b>0.2 (0.6)</b>              | <b>&lt;0.001</b> |
| ICC (95% CI)                                             | 0.5<br>(0.4 – 0.6)  | 0.4<br>(0.3 – 0.5)        | 0.5<br>(0.4 – 0.6)  | 0.2 (0.1 – 0.3)               |                  |

®Paired samples T-test. \*Number of cases included for 5-year analysis; 2-year data excluded in 5-year analysis. \*\*Mean of 3 readers. †Missing data from at least one time point and one reader for 4 cases. ‡Fatty lesions, erosions, bone spurs, ankylosis. ICC, Intra-class correlation coefficient ; CI, Confidence Interval; NC, Not possible to calculate.
